# Supplementary material for: Incidence Rate of Hypersensitivity Reactions to Bee-Venom Acupuncture
Source: PubMed Central journal article supplement (PMC7577189; doi:10.3389/fphar.2020.545555), 2020-10-07
Supplement: Table_1.pdf [file Table_1.pdf]

## Supplementary table

**Table S1. Severity of hypersensitivity reactions and criteria for anaphylaxis**

| Grading the severity by Brown SG                                                                        | Signs and symptoms                                                                                                                                                        |
|---------------------------------------------------------------------------------------------------------|---------------------------------------------------------------------------------------------------------------------------------------------------------------------------|
| Grade 1.<br>Mild (skin and subcutaneous tissues only)                                                   | Generalized erythema, urticaria, periorbital edema, or angioedema                                                                                                         |
| Grade 2.<br>Moderate (features suggesting respiratory, cardiovascular, or gastrointestinal involvement) | Dyspnea, stridor, wheezing, nausea, vomiting, dizziness (presyncope), diaphoresis, chest or throat tightness, or abdominal pain                                           |
| Grade 3.<br>Severe (hypoxia, hypotension, or neurological compromise)                                   | Cyanosis or SpO <sub>2</sub> < 92% at any stage, hypotension (systolic blood pressure < 90 mmHg in adults), confusion, collapse, a loss of consciousness, or incontinence |
| Criteria for diagnosing anaphylaxis by the World Allergy Organization                                   |                                                                                                                                                                           |

Anaphylaxis is a highly likely event when any one of the following three criteria is fulfilled:

1. Acute onset of an illness (minutes to several hours) with the involvement of skin, mucosal tissue, or both. IT ALSO INVOLVES AT LEAST ONE OF THE FOLLOWING: A) respiratory distress, B) reduced blood pressure or associated symptoms of end-organ dysfunction OR
2. Two or more of the following that occurs rapidly when the patient is exposed to a likely allergen (minutes to several hours): A) the involvement of the skin-mucosal tissue, B) respiratory compromise (e.g., dyspnea, wheeze-bronchospasm, stridor, reduced PEF, hypoxemia), C) low blood pressure or associated symptoms, D) persistent gastrointestinal dysfunction OR
3. Lowered blood pressure of the patient after exposure to a known allergen (minutes to several hours). A) Infants and children: low systolic blood pressure (age-specific) or more than a 30% decrease in systolic blood pressure; B) Adults: systolic blood pressure of less than 90 mmHg or more than a 30% decrease from that person's baseline
